# Supplementary material for: Electrospun PEO/PEDOT:PSS Nanofibers for Wearable Physiological Flex Sensors
Source: MDPI journal article supplement (doi:10.3390/s21124110), 2021-06-15
Supplement: s1 [file s1]

## Supporting Informations

The figure S1 reports the characterization of the flex sensor for several bending cycles. The angle of deformation for these cycles was 45°.

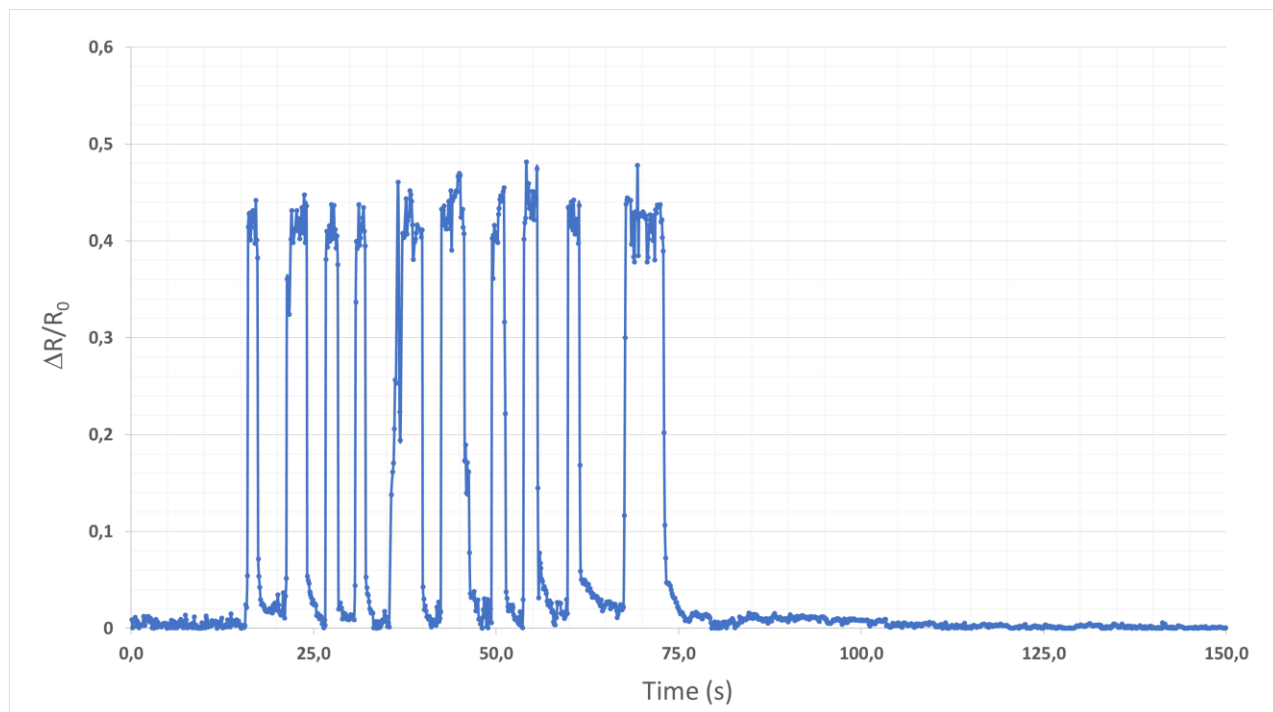

**Figure S1.** Response of the flexible sensor to bending cycles.
